# Supplementary material for: A nanocarrier containing carboxylic and histamine groups with dual action: acetylcholine hydrolysis and antidote atropine delivery
Source: publisher site journal article supplement (doi:10.3762/bjnano.16.2), 2025-01-09
Supplement: Additional file 1 [file 2190-4286-16-2-S1.pdf]

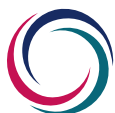

## Supporting Information

for

### **A nanocarrier containing carboxylic and histamine groups with dual action: acetylcholine hydrolysis and antidote atropine delivery**

Elina E. Mansurova, Andrey A. Maslennikov, Anna P. Lyubina, Alexandra D. Voloshina, Irek R. Nizameev, Marsil K. Kadirov, Anzhela A. Mikhailova, Polina V. Mikshina, Albina Y. Ziganshina and Igor S. Antipin

*Beilstein J. Nanotechnol.* **2025**, *16*, 11–24. [doi:10.3762/bjnano.16.2](https://doi.org/10.3762/bjnano.16.2)

**$^1\text{H}$  and  $^{13}\text{C}$  NMR spectra of Hist-RA and CA-RA; GPC data (molecular weight distribution); hemolytic activity of Hist-RA, CA-RA, and p(Hist-CA); DLS data of p(Hist-CA) before and after ACh addition; and the effects of CA-RA, Hist-RA, ACh, and AcOH on the fluorescence spectrum of FI**

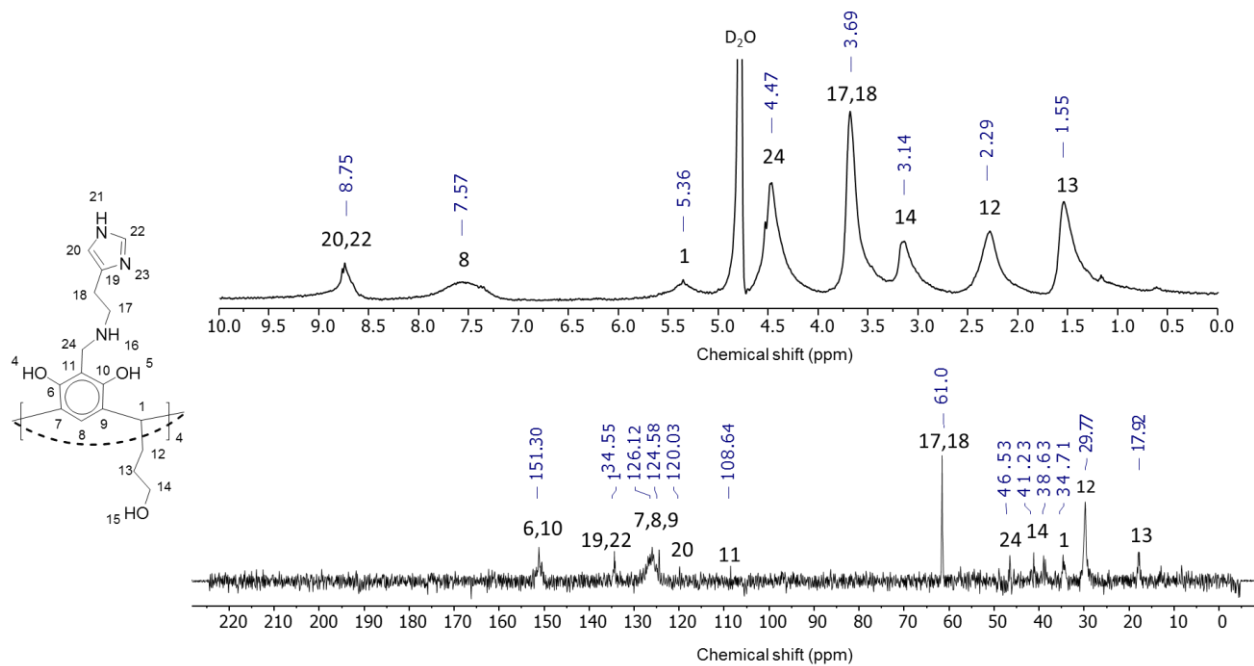

**Figure S1:**  $^1\text{H}$  and  $^{13}\text{C}$  NMR spectra of Hist-RA in  $\text{D}_2\text{O}$ ,  $25^\circ\text{C}$ .

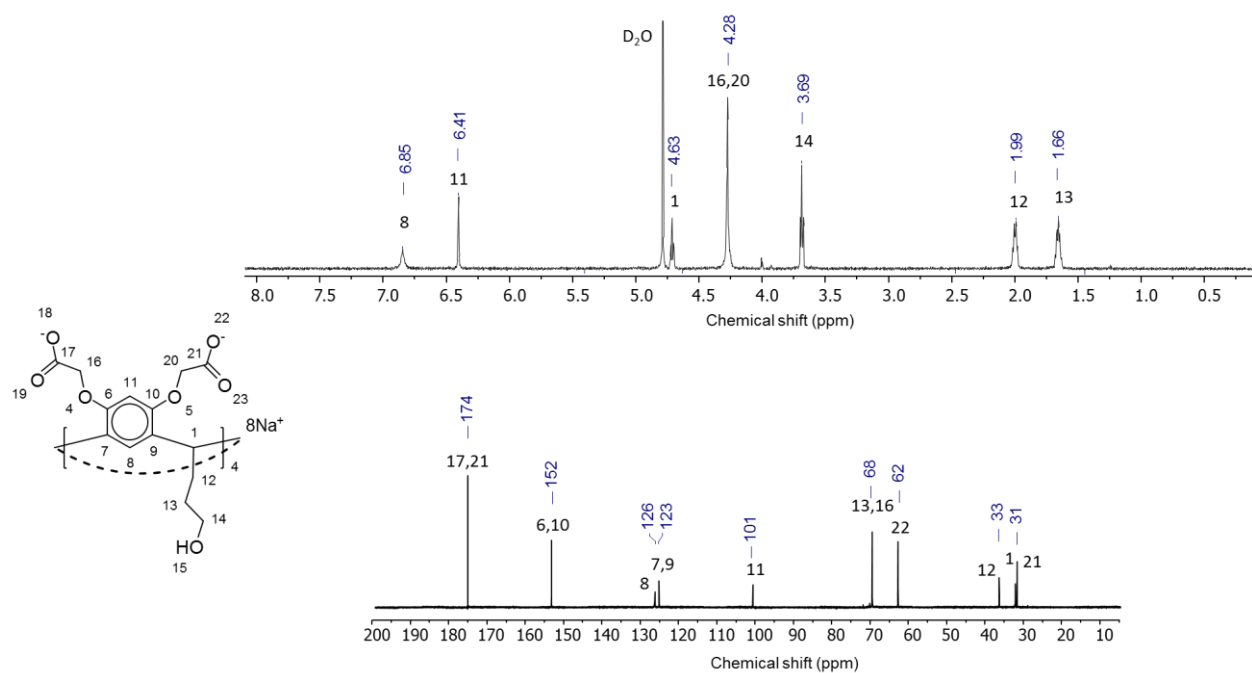

**Figure S2:**  $^1\text{H}$  and  $^{13}\text{C}$  NMR spectra of CA-RA in  $\text{D}_2\text{O}$ ,  $25^\circ\text{C}$ .

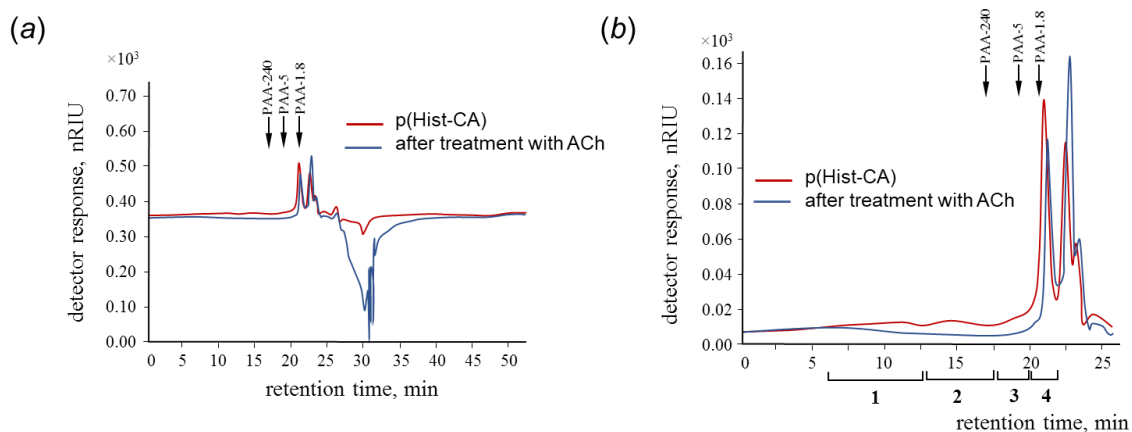

**Figure S3:** Molecular weight distribution of water-soluble portion of p(Hist-CA) before and after addition of ACh at separation on OHPak SB-806M HQ column. Combinations of peaks are indicated by brackets, (a) 50 min period, (b) 25 min period,  $C(\text{p(Hist-CA)}) = 1 \text{ mg/mL}$ ,  $C(\text{ACh}) = 4 \text{ mM}$ ,  $0.05 \text{ M K}_2\text{HPO}_4$ , pH 7.4.

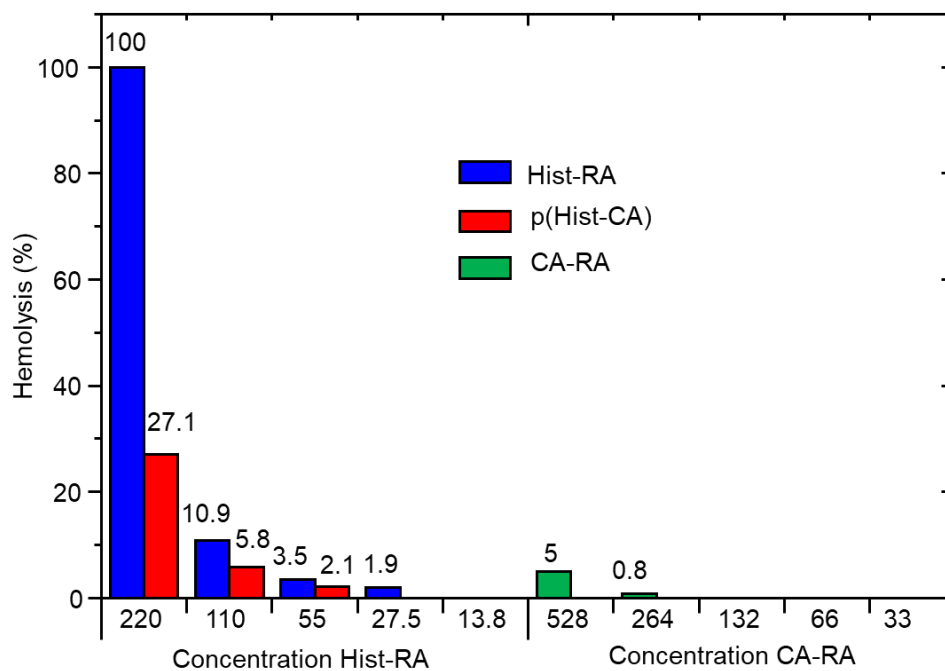

**Figure S4:** The dependence of hemolysis (%) on the concentration of Hist-RA, CA-RA and p(Hist-CA).

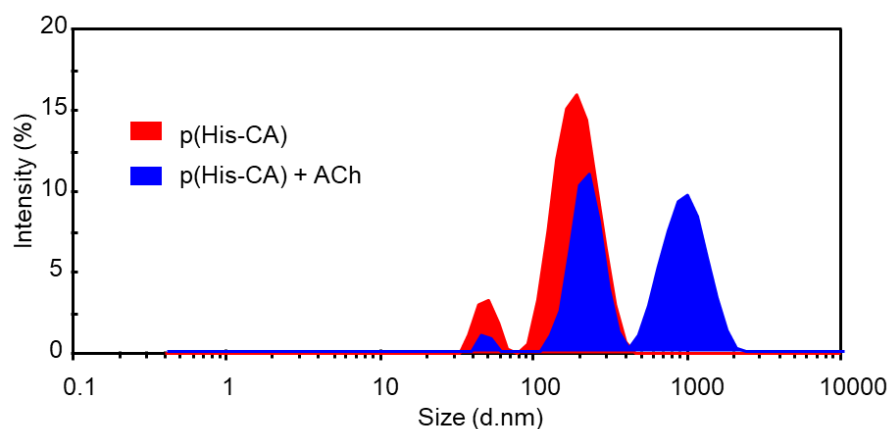

**Figure S5:** Distribution diagrams of the hydrodynamic diameter of p(Hist-CA) before and after addition of ACh,  $C(\text{p(Hist-CA)}) = 1 \text{ mg/mL}$ ,  $C(\text{ACh}) = 4 \text{ mM}$ , PB pH 7.4, 25 °C.

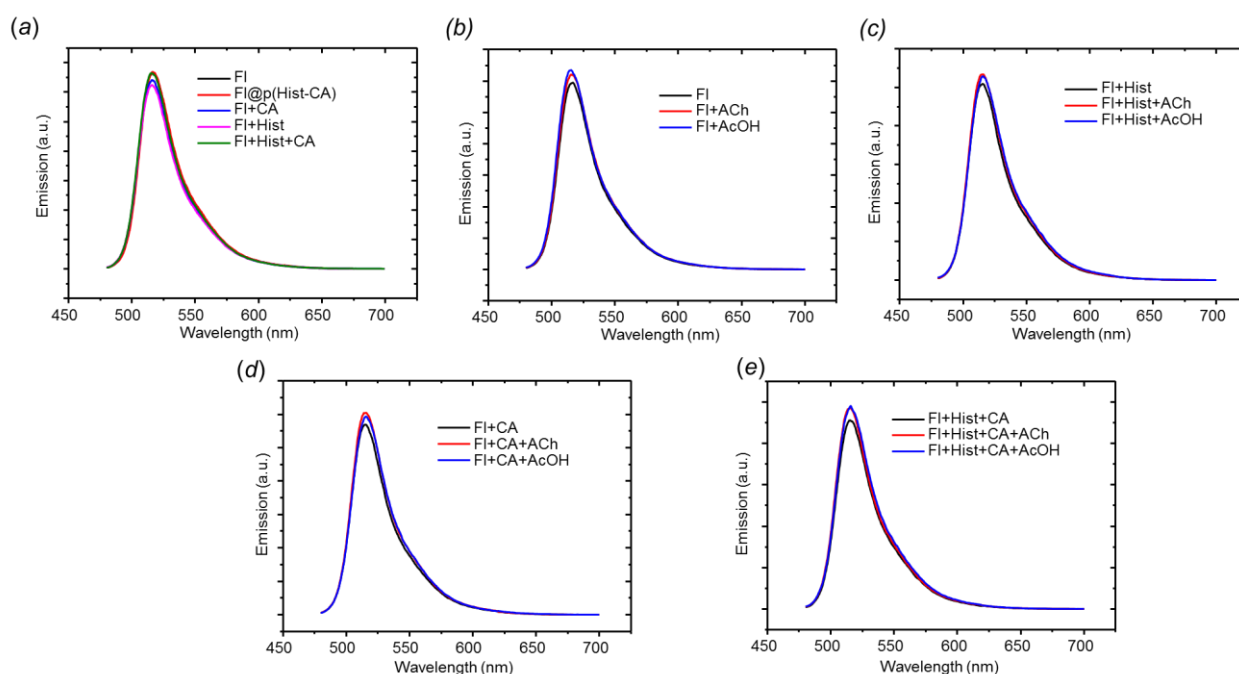

**Figure S6:** Fluorescence spectra of (a) FI, FI@p(Hist-CA) and mixtures of FI + CA-RA, FI + Hist-RA, FI + Hist-RA + CA-RA, (b–e) systems before and after addition of ACh or AcOH: (b) FI, (c) FI + Hist-RA, (d) FI + CA-RA and (e) FI + Hist-RA + CA-RA,  $C(\text{FI}) = 0.01 \text{ mM}$ ;  $C(\text{Hist-RA}) = 0.05 \text{ mM}$ ,  $C(\text{CA-RA}) = 0.11 \text{ mM}$ ,  $C(\text{ACh}) = C(\text{AcOH}) = 1.6 \text{ mM}$ ; PB pH 7.4, 25 °C.
